# Supplementary material for: APOE4 Increases Energy Metabolism in APOE-Isogenic iPSC-Derived Neurons
Source: MDPI journal article supplement (doi:10.3390/cells13141207), 2024-07-17
Supplement: s1 [file s1]

## Sheet: FIg. 1E - intracellular
Test for normal distribution
Shapiro-Wilk test	KO	E2	E3	E4
W		0.8721	0.8706	0.8303
P value		0.3058	0.3	0.1687
Passed normality test (alpha=0.05)?		Yes	Yes	Yes
P value summary		ns	ns	ns
Number of values		4	4	4
One-Way ANOVA
Tukey's multiple comparisons test	Mean Diff.	95.00% CI of diff.	Below threshold?	Summary	Adjusted P Value
E2 vs. E3	27.8	-9.615 to 65.22	No	ns	0.1503
E2 vs. E4	28.73	-8.692 to 66.14	No	ns	0.1356
E3 vs. E4	0.9237	-36.49 to 38.34	No	ns	0.9974

## Sheet: FIg. 1E - extracellular
Test for normal distribution
Shapiro-Wilk test	KO	E2	E3	E4
W		0.8906	0.8858	0.9439
P value		0.3859	0.364	0.6784
Passed normality test (alpha=0.05)?		Yes	Yes	Yes
P value summary		ns	ns	ns
Number of values		4	4	4
One-Way ANOVA
Tukey's multiple comparisons test	Mean Diff.	95.00% CI of diff.	Below threshold?	Summary	Adjusted P Value
E2 vs. E3	1.559	-7.153 to 10.27	No	ns	0.8733
E2 vs. E4	-3.349	-12.06 to 5.363	No	ns	0.5529
E3 vs. E4	-4.908	-13.62 to 3.804	No	ns	0.3053

## Sheet: FIg. 1F - intracellular
Test for normal distribution
Shapiro-Wilk test	KO	E2	E3	E4
W		0.9757	0.9543	0.9511
P value		0.7012	0.5885	0.5743
Passed normality test (alpha=0.05)?		Yes	Yes	Yes
P value summary		ns	ns	ns
Number of values		3	3	3
One-Way ANOVA
Tukey's multiple comparisons test	Mean Diff.	95.00% CI of diff.	Below threshold?	Summary	Adjusted P Value
E2 vs. E3	-0.4692	-1.796 to 0.8574	No	ns	0.5563
E2 vs. E4	-0.01218	-1.339 to 1.314	No	ns	0.9996
E3 vs. E4	0.457	-0.8695 to 1.784	No	ns	0.5718

## Sheet: FIg. 1F - extracellular
Test for normal distribution
Shapiro-Wilk test	KO	E2	E3	E4
W		0.9225	0.9477	0.7988
P value		0.4613	0.5595	0.1117
Passed normality test (alpha=0.05)?		Yes	Yes	Yes
P value summary		ns	ns	ns
Number of values		3	3	3
One-Way ANOVA
Tukey's multiple comparisons test	Mean Diff.	95.00% CI of diff.	Below threshold?	Summary	Adjusted P Value
E2 vs. E3	0.01491	-0.02196 to 0.05179	No	ns	0.4746
E2 vs. E4	-0.01079	-0.04767 to 0.02609	No	ns	0.6614
E3 vs. E4	-0.0257	-0.06258 to 0.01118	No	ns	0.1619

## Sheet: FIg. 2E
Test for normal distribution
Shapiro-Wilk test	KO	E2	E3	E4
W	0.8897	0.9741	0.921	0.9368
P value	0.0799	0.9259	0.259	0.3786
Passed normality test (alpha=0.05)?	Yes	Yes	Yes	Yes
P value summary	ns	ns	ns	ns
Number of values	14	14	13	14
One-Way ANOVA
Tukey's multiple comparisons test	Mean Diff.	95.00% CI of diff.	Below threshold?	Summary	Adjusted P Value
K.O. vs. E2	12.93	-0.4796 to 26.35	No	ns	0.0625
K.O. vs. E3	0.5182	-13.15 to 14.19	No	ns	0.9996
K.O. vs. E4	-10.02	-23.44 to 3.392	No	ns	0.2074
E2 vs. E3	-12.42	-26.09 to 1.253	No	ns	0.0875
E2 vs. E4	-22.96	-36.37 to -9.542	Yes	***	0.0002
E3 vs. E4	-10.54	-24.21 to 3.130	No	ns	0.1843

## Sheet: FIg. 2F
Test for normal distribution
Shapiro-Wilk test	KO	E2	E3	E4
W	0.892	0.8668	0.9191	0.9386
P value	0.0865	0.0379	0.2135	0.4002
Passed normality test (alpha=0.05)?	Yes	No	Yes	Yes
P value summary	ns	*	ns	ns
Number of values	14	14	14	14
Kruskal-Wallis Test
Dunn's multiple comparisons test	Mean rank diff.	Significant?	Summary	Adjusted P Value
K.O. vs. E2	3.643	No	ns	>0.9999
K.O. vs. E3	0.2143	No	ns	>0.9999
K.O. vs. E4	-9.286	No	ns	0.7919
E2 vs. E3	-3.429	No	ns	>0.9999
E2 vs. E4	-12.93	No	ns	0.2158
E3 vs. E4	-9.5	No	ns	0.7397

## Sheet: FIg. 2G
Test for normal distribution
Shapiro-Wilk test	KO	E2	E3	E4
W	0.9418	0.8876	0.8879	0.9404
P value	0.4416	0.0746	0.0754	0.4231
Passed normality test (alpha=0.05)?	Yes	Yes	Yes	Yes
P value summary	ns	ns	ns	ns
Number of values	14	14	14	14
One-Way ANOVA
Tukey's multiple comparisons test	Mean Diff.	95.00% CI of diff.	Below threshold?	Summary	Adjusted P Value
K.O. vs. E2	15.16	-7.036 to 37.35	No	ns	0.279
K.O. vs. E3	-0.3186	-22.51 to 21.88	No	ns	>0.9999
K.O. vs. E4	-17.61	-39.81 to 4.584	No	ns	0.1647
E2 vs. E3	-15.48	-37.67 to 6.717	No	ns	0.2618
E2 vs. E4	-32.77	-54.97 to -10.58	Yes	**	0.0015
E3 vs. E4	-17.29	-39.49 to 4.902	No	ns	0.1772

## Sheet: FIg. 2I
Test for normal distribution
Shapiro-Wilk test	KO	E2	E3	E4
W	0.9359	0.8252	0.9504	0.8959
P value	0.3679	0.0104	0.6037	0.0825
Passed normality test (alpha=0.05)?	Yes	No	Yes	Yes
P value summary	ns	*	ns	ns
Number of values	14	14	13	15
Kruskal-Wallis Test
Dunn's multiple comparisons test	Mean rank diff.	Significant?	Summary	Adjusted P Value
K.O. vs. E2	-8.429	No	ns	>0.9999
K.O. vs. E3	-5.495	No	ns	>0.9999
K.O. vs. E4	-32.44	Yes	****	<0.0001
E2 vs. E3	2.934	No	ns	>0.9999
E2 vs. E4	-24.01	Yes	***	0.0004
E3 vs. E4	-26.94	Yes	****	<0.0001

## Sheet: FIg. 2J
Test for normal distribution
Shapiro-Wilk test	KO	E2	E3	E4
W	0.9551	0.831	0.9607	0.9628
P value	0.6431	0.0124	0.7642	0.7415
Passed normality test (alpha=0.05)?	Yes	No	Yes	Yes
P value summary	ns	*	ns	ns
Number of values	14	14	13	15
Kruskal-Wallis Test
Dunn's multiple comparisons test	Mean rank diff.	Significant?	Summary	Adjusted P Value
K.O. vs. E2	1.143	No	ns	>0.9999
K.O. vs. E3	-0.7198	No	ns	>0.9999
K.O. vs. E4	-19.64	Yes	**	0.0071
E2 vs. E3	-1.863	No	ns	>0.9999
E2 vs. E4	-20.79	Yes	**	0.0036
E3 vs. E4	-18.92	Yes	*	0.0132

## Sheet: FIg. 2K
Test for normal distribution
Shapiro-Wilk test	KO	E2	E3	E4
W	0.8864	0.804	0.9003	0.9135
P value	0.0719	0.0056	0.135	0.1532
Passed normality test (alpha=0.05)?	Yes	No	Yes	Yes
P value summary	ns	**	ns	ns
Number of values	14	14	13	15
Kruskal-Wallis Test
Dunn's multiple comparisons test	Mean rank diff.	Significant?	Summary	Adjusted P Value
K.O. vs. E2	-1.857	No	ns	>0.9999
K.O. vs. E3	0.07143	No	ns	>0.9999
K.O. vs. E4	-26.06	Yes	***	0.0001
E2 vs. E3	1.929	No	ns	>0.9999
E2 vs. E4	-24.2	Yes	***	0.0004
E3 vs. E4	-26.13	Yes	***	0.0001

[truncated: 16 more sheets: Fig. 3C, Fig. 3D, Fig. 3E, Fig. 3F, Fig. 3G, Fig. 3H, Fig. 3I, Fig. 3J, Fig. 4E, Fig. 4F, Fig. 4G, Fig. 4H, Fig. 4I, Fig. 4J, Fig. 4K, Fig. 4L]
