# Supplementary material for: APOE4 Increases Energy Metabolism in APOE-Isogenic iPSC-Derived Neurons
Source: MDPI journal article supplement (doi:10.3390/cells13141207), 2024-07-17
Supplement: s1 [file s1]

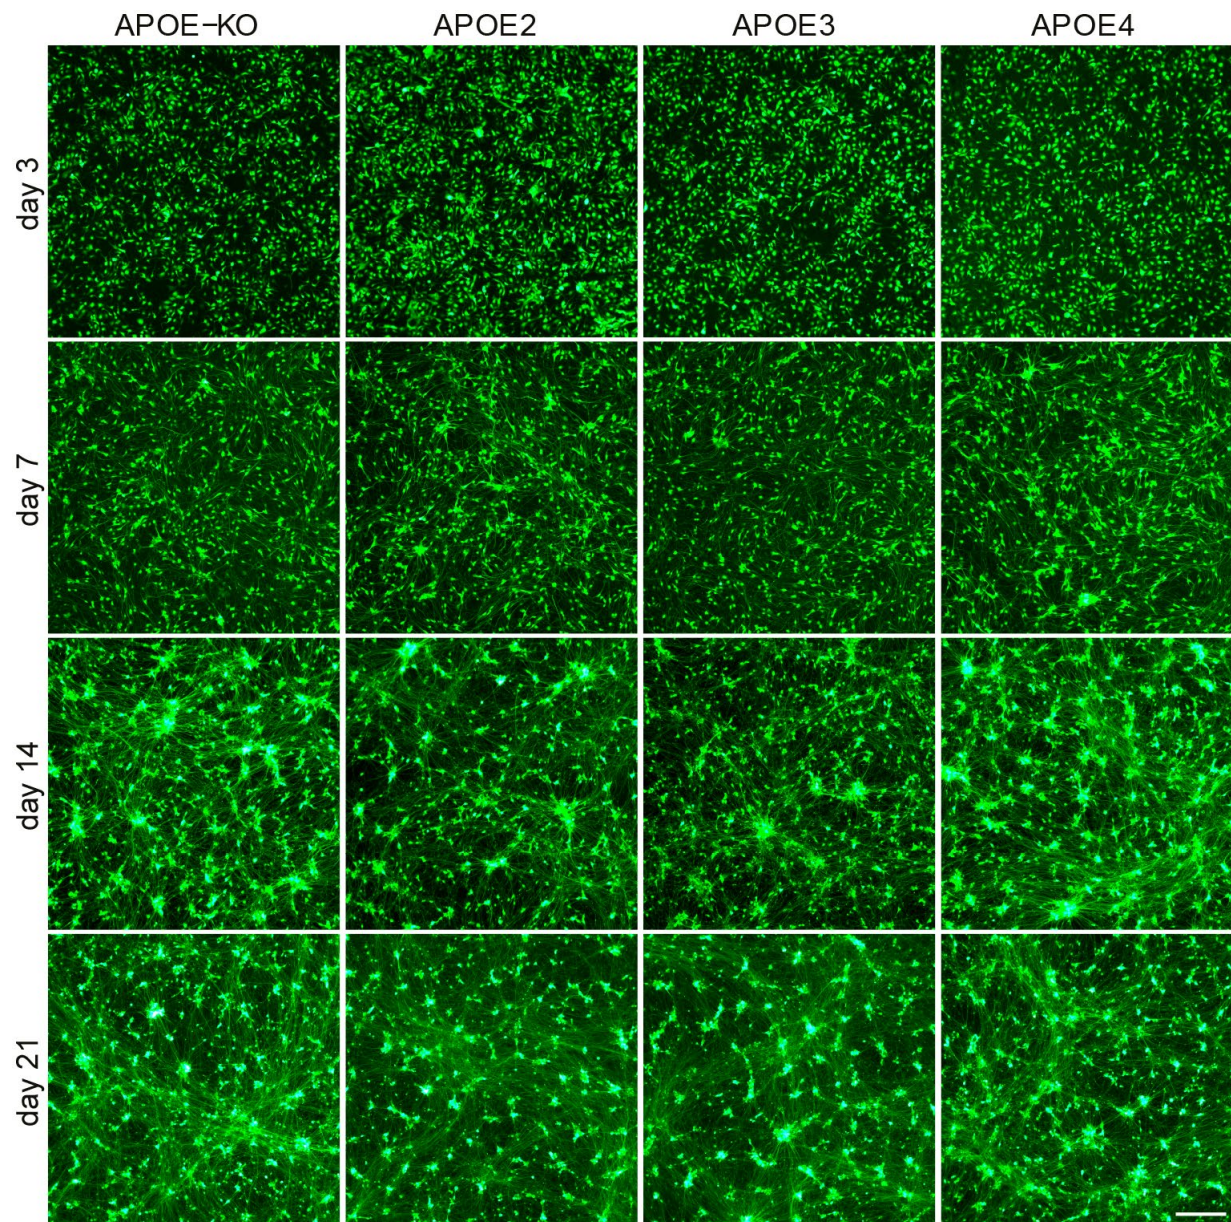

**Figure S1: iN cell differentiation over time.** Representative fluorescence images of GFP-expressing *APOE*-isogenic iN cells at different time points after induction of differentiation. Scale bar: 50  $\mu$ m

**Table S1: List of qPCR primer.**

|       |     |                             |
|-------|-----|-----------------------------|
| GAPDH | FWD | ACC ACA GTC CAT GCC ATC AC  |
|       | REV | TCC ACC CTG TTG CTG TA      |
| MAP2  | FWD | CTC AGC ACC GCT AAC AGA GG  |
|       | REV | CAT TGG CGC TTC GGA CAA G   |
| OCT4  | FWD | GAG AAG CTG GAG CAA AAC CC  |
|       | REV | ACC TTC CCA AAT AGA ACC CCC |
| TUBB3 | FWD | GGC CAA GGG TCA CTA CAC G   |
|       | REV | GCA GTC GCA GTT TTC ACA CTC |
